# Supplementary material
Source: PubMed Central journal article supplement (PMC6933287)
Supplement: NIHMS1062310-supplement-table_1.pdf [file NIHMS1062310-supplement-table_1.pdf]

**Supplementary Table S1**—Additional SMRs for the same 189 decedents as in Table 1.

| Occupation and sex                                    | Employment status, manner of death, and age                 | No. of deaths |          | SMR (95% CI)   |
|-------------------------------------------------------|-------------------------------------------------------------|---------------|----------|----------------|
|                                                       |                                                             | Observed      | Expected |                |
| Veterinarians                                         |                                                             |               |          |                |
| Male                                                  |                                                             |               |          |                |
|                                                       | Ever employed, suicide deaths, age 25–69                    | 37            | 21.5     | 1.7 (1.2–2.3)  |
|                                                       | Employed at death, suicide deaths, age 25–74                | 36            | 22.6     | 1.6 (1.1–2.1)  |
|                                                       | Ever employed, suicide deaths, age 25–74                    | 39            | 22.6     | 1.7 (1.2–2.3)  |
|                                                       | Employed at death, suicide + undetermined deaths, age 25–69 | 36            | 21.5     | 1.7 (1.1–2.2)  |
|                                                       | Ever employed, suicide + undetermined deaths, age 25–69     | 40            | 21.5     | 1.9 (1.3–2.4)  |
|                                                       | Employed at death, suicide + undetermined deaths, age 25–74 | 38            | 22.6     | 1.7 (1.1–2.2)  |
|                                                       | Ever employed, suicide + undetermined deaths, age 25–74     | 42            | 22.6     | 1.9 (1.3–2.4)  |
| Female                                                |                                                             |               |          |                |
|                                                       | Ever employed, suicide deaths, age 25–69                    | 18            | 6.6      | 2.7 (1.5–4.0)  |
|                                                       | Employed at death, suicide deaths, age 25–74                | 16            | 6.8      | 2.4 (1.2–3.5)  |
|                                                       | Ever employed, suicide deaths, age 25–74                    | 18            | 6.8      | 2.6 (1.4–3.9)  |
|                                                       | Employed at death, suicide + undetermined deaths, age 25–69 | 17            | 6.6      | 2.6 (1.4–3.8)  |
|                                                       | Ever employed, suicide + undetermined deaths, age 25–69     | 19            | 6.6      | 2.9 (1.6–4.2)  |
|                                                       | Employed at death, suicide + undetermined deaths, age 25–74 | 17            | 6.8      | 2.5 (1.3–3.7)  |
|                                                       | Ever employed, suicide + undetermined deaths, age 25–74     | 19            | 6.8      | 2.8 (1.5–4.0)  |
| Veterinary technicians or technologists               |                                                             |               |          |                |
| Male                                                  |                                                             |               |          |                |
|                                                       | Ever employed, suicide deaths, age 20–69                    | 17            | 3.0      | 5.7 (3.0–8.4)  |
|                                                       | Employed at death, suicide + undetermined deaths, age 20–69 | 19            | 3.0      | 6.4 (3.5–9.2)  |
|                                                       | Ever employed, suicide + undetermined deaths, age 20–69     | 21            | 3.0      | 7.0 (4.0–10.2) |
| Female                                                |                                                             |               |          |                |
|                                                       | Ever employed, suicide deaths, age 20–69                    | 41            | 15.9     | 2.6 (1.8–3.4)  |
|                                                       | Employed at death, suicide + undetermined deaths, age 20–69 | 47            | 15.9     | 3.0 (2.1–3.8)  |
|                                                       | Ever employed, suicide + undetermined deaths, age 20–69     | 55            | 15.9     | 3.5 (2.6–4.4)  |
| Veterinary assistants or laboratory animal caretakers |                                                             |               |          |                |
| Male                                                  |                                                             |               |          |                |
|                                                       | Ever employed, suicide deaths, age 20–69                    | 10            | 10.8     | 0.9 (0.4–1.5)  |
|                                                       | Employed at death, suicide + undetermined deaths, age 20–69 | 12            | 10.8     | 1.1 (0.5–1.7)  |
|                                                       | Ever employed, suicide + undetermined deaths, age 20–69     | 13            | 10.8     | 1.2 (0.6–1.9)  |
| Female                                                |                                                             |               |          |                |
|                                                       | Ever employed, suicide deaths, age 20–69                    | 20            | 12.1     | 1.7 (0.9–2.4)  |
|                                                       | Employed at death, suicide + undetermined deaths, age 20–69 | 22            | 12.1     | 1.8 (1.1–2.6)  |
|                                                       | Ever employed, suicide + undetermined deaths, age 20–69     | 25            | 12.1     | 2.1 (1.3–2.9)  |

*See* Tables 1 and 2 for key.
