# Supplementary material
Source: PubMed Central journal article supplement (PMC6933287)
Supplement: NIHMS1062310-supplement-table_2.pdf [file NIHMS1062310-supplement-table_2.pdf]

**Supplementary Table S2**—Demographic data for 47 of the 73 veterinarians in Table 1 who died by suicide and had firearms injury or pentobarbital poisoning listed as a mechanism of death.

| <b>Demographic variable</b>                     | <b>Firearm<br/>(n = 29)</b> | <b>Pentobarbital<br/>(n = 18)</b> | <b>P value</b> |
|-------------------------------------------------|-----------------------------|-----------------------------------|----------------|
| Sex                                             |                             |                                   | 0.33           |
| Male                                            | 23 (79%)                    | 12 (67%)                          |                |
| Female                                          | 6 (21%)                     | 6 (33%)                           |                |
| Marital status                                  |                             |                                   | 0.14           |
| Married or part of a civil union                | 18 (62%)                    | 8 (44%)                           |                |
| Never married                                   | —                           | 5 (28%)                           |                |
| Widowed, divorced, or separated                 | 9 (31%)                     | 5 (28%)                           |                |
| Single, not otherwise specified or unknown      | —                           | —0 (0%)                           |                |
| Race and ethnicity                              |                             |                                   | NA             |
| White, non-Hispanic                             | 29 (100%)                   | 18 (100%)                         |                |
| Non-white, non-Hispanic (including multiracial) | 0 (0%)                      | 0 (0%)                            |                |
| Hispanic                                        | 0 (0%)                      | 0 (0%)                            |                |
| Age                                             |                             |                                   | 0.68           |
| 15–29                                           | 0 (0%)                      | 0 (0%)                            |                |
| 30–49                                           | 8 (28%)                     | 6 (33%)                           |                |
| ≥ 50                                            | 21 (72%)                    | 12 (67%)                          |                |
| Employment status at death                      |                             |                                   | 0.57           |
| Employed                                        | —                           | —                                 |                |
| Not employed                                    | —                           | —                                 |                |

The analysis excluded deaths of undetermined intent.  
 NA = Not applicable. *See* Tables 1 and 3 for remainder of key.
