# Supplementary material
Source: PubMed Central journal article supplement (PMC6933287)
Supplement: NIHMS1062310-supplement-table_3.pdf [file NIHMS1062310-supplement-table_3.pdf]

**Supplementary Table S3**—Death and death-related injury variables for same 47 veterinarians in Supplementary Table S2.

| <b>Variable</b>                                | <b>Firearm<br/>(n = 29)</b> | <b>Pentobarbital<br/>(n = 18)</b> | <b>P value</b> |
|------------------------------------------------|-----------------------------|-----------------------------------|----------------|
| Manner of Death                                |                             |                                   | NA             |
| Suicide                                        | 29 (100%)                   | 18 (100%)                         |                |
| Undetermined intent                            | 0 (0%)                      | 0 (0%)                            |                |
| Alcohol use suspected in hours prior to death† |                             |                                   | 0.47           |
| Yes                                            | 9 (31%)                     | —                                 |                |
| No                                             | 13 (45%)                    | 11 (61%)                          |                |
| Unknown or not recorded                        | 7 (24%)                     | —                                 |                |
| Decedent seen in emergency department‡         |                             |                                   | 0.01           |
| Yes                                            | 0 (0%) <sup>a</sup>         | — <sup>a</sup>                    |                |
| No                                             | 13 (45%) <sup>a</sup>       | 13 (72%) <sup>a</sup>             |                |
| Unknown or not recorded                        | 16 (55%) <sup>a</sup>       | — <sup>b</sup>                    |                |
| Injury occurred at decedent's residence        |                             |                                   | 0.53           |
| Yes                                            | 23 (79%)                    | 13 (72%)                          |                |
| No                                             | —                           | —                                 |                |
| Unknown or not recorded                        | —                           | —                                 |                |
| Injury occurred at work                        |                             |                                   | 0.65           |
| Yes                                            | — <sup>a</sup>              | — <sup>a</sup>                    |                |
| No                                             | 24 (83%) <sup>a</sup>       | 16 (89%) <sup>a</sup>             |                |
| Unknown or not recorded                        | — <sup>a</sup>              | — <sup>a</sup>                    |                |

NA = Not applicable. *See* Tables 1 and 3 for key.
