# Supplementary material
Source: PubMed Central journal article supplement (PMC6933287)
Supplement: NIHMS1062310-supplement-table_4.pdf [file NIHMS1062310-supplement-table_4.pdf]

**Supplementary Table S4**—Psychosocial circumstances of death for the veterinarians in Supplementary Table S2 with information available in NVDRS records.

| <b>Variable</b>                                                      | <b>Firearm<br/>(n = 26)</b> | <b>Pentobarbital<br/>(n = 18)</b> | <b>P value</b> |
|----------------------------------------------------------------------|-----------------------------|-----------------------------------|----------------|
| History of suicide attempt before the fatal incident                 | —                           | —                                 | 0.63           |
| Suicide intent disclosed to another person                           | 9 (35%)                     | 6 (33%)                           | 0.93           |
| Suicide note left                                                    | 5 (19%) <sup>a</sup>        | 9 (50%) <sup>b</sup>              | 0.03           |
| Crisis¶                                                              | 10 (39%)                    | 5 (28%)                           | 0.46           |
| Mental health problem at time of death                               | 12 (46%)                    | 10 (56%)                          | 0.54           |
| Mental health or substance abuse treatment ≤ 2 months prior to death | 7 (27%)                     | 6 (33%)                           | 0.65           |
| History of mental health or substance abuse treatment (at any time)  | 12 (46%)                    | 8 (44%)                           | 0.91           |
| Depressed mood                                                       | 15 (58%)                    | 6 (33%)                           | 0.11           |
| Alcohol problem                                                      | 6 (23%)                     | —                                 | 0.12           |
| Other substance abuse                                                | —                           | —                                 | 0.36           |
| Intimate partner problem                                             | 8 (31%)                     | 5 (28%)                           | 0.83           |
| Family relationship (other than intimate partner) problem            | —                           | —                                 | 0.14           |
| Other relationship problem                                           | —                           | —                                 | 0.97           |
| Contributing criminal legal problem                                  | —                           | —                                 | 0.79           |
| Contributing civil legal problem                                     | —                           | —                                 | 0.78           |
| Contributing physical health problem                                 | 8 (31%)                     | —                                 | 0.53           |
| Contributing job problem                                             | 6 (23%)                     | —                                 | 0.60           |
| Contributing financial problem                                       | 6 (23%)                     | —                                 | 0.12           |
| Death of friend or family member                                     | —                           | —                                 | 0.97           |

*See* Tables 1 and 5 for key.
